# Supplementary material for: Genetic variants in eleven central and peripheral chemoreceptor genes in sudden infant death syndrome
Source: PubMed Central journal article supplement (PMC9586864; doi:10.1038/s41390-021-01899-4), 2022-02-01
Supplement: 41390_2021_1899_MOESM1_ESM.pdf [file 41390_2021_1899_MOESM1_ESM.pdf]

## Supplementary data

**Table S1** Detailed information on the 11 investigated genes.

| Gene          | Chr. | Start position | End position | Length  | Nr. of exons | Coding sequence length (nt) | Protein length (aa) |
|---------------|------|----------------|--------------|---------|--------------|-----------------------------|---------------------|
| <i>ATOH1</i>  | 4    | 94'750'042     | 94'751'221   | 1'179   | 1            | 927                         | 309                 |
| <i>GPR4</i>   | 19   | 46'093'022     | 46'105'466   | 12'444  | 2            | 1'086                       | 362                 |
| <i>KCNJ16</i> | 17   | 68'049'570     | 68'131'749   | 82'179  | 5            | 1'254                       | 418                 |
| <i>KCNK3</i>  | 2    | 26'915'619     | 26'956'288   | 40'669  | 2            | 1'185                       | 394                 |
| <i>KCNK5</i>  | 6    | 39'156'749     | 39'197'226   | 40'477  | 5            | 1'500                       | 499                 |
| <i>KCNK9</i>  | 8    | 140'613'081    | 140'715'299  | 102'218 | 4            | 1'125                       | 374                 |
| <i>KCNMA1</i> | 10   | 78'629'359     | 79'398'353   | 768'994 | 28           | 3'711                       | 1'236               |
| <i>MECP2</i>  | X    | 153'287'024    | 153'336'212  | 49'188  | 4            | 1'497                       | 498                 |
| <i>NDUFS2</i> | 1    | 161'166'894    | 161'184'185  | 17'291  | 13           | 1'392                       | 463                 |
| <i>OR51E2</i> | 11   | 4'701'401      | 4'719'084    | 17'683  | 2            | 960                         | 320                 |
| <i>PHOX2B</i> | 4    | 41'746'099     | 41'750'987   | 4'888   | 3            | 416                         | 139                 |

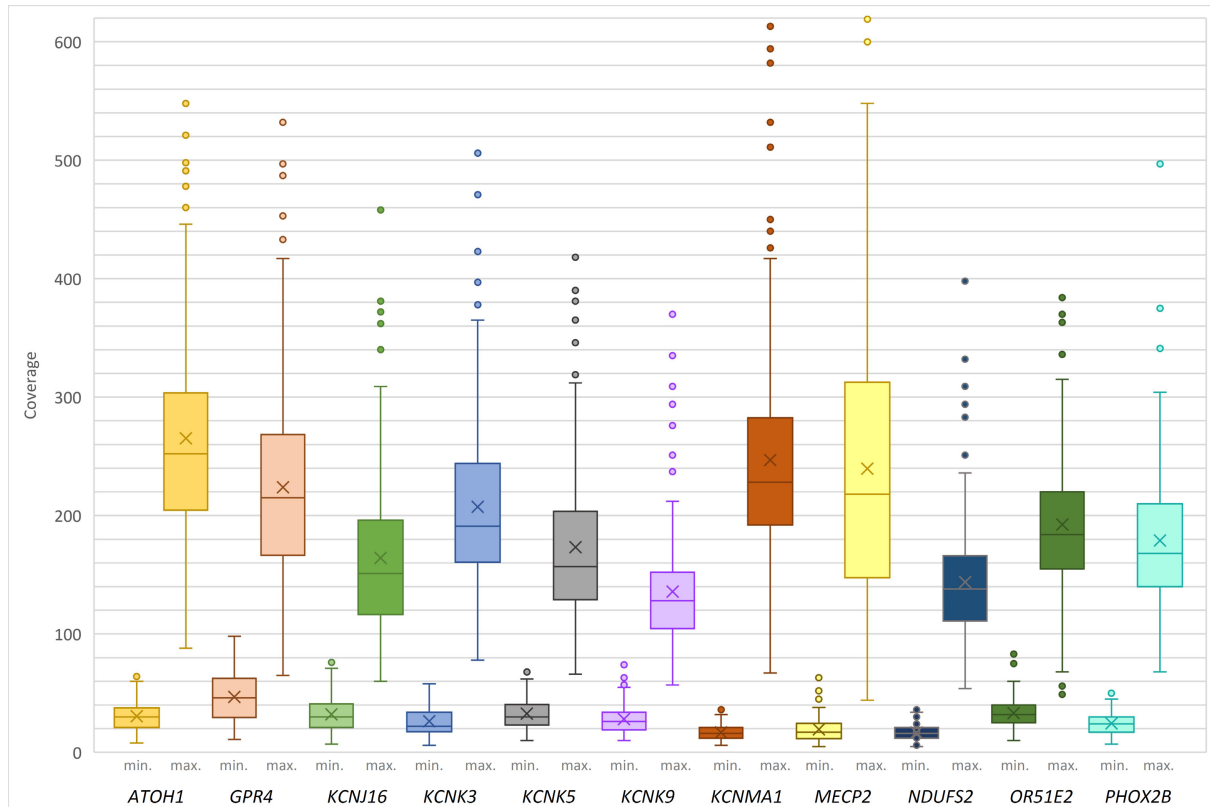

**Figure S1** Minimum and maximum coverage of the exonic part of the 11 genes investigated in the SIDS cohort. Within the 11 genes, the minimum mean exonic coverage was  $29.98 \pm 15.01$  and the maximum mean exonic coverage was  $197.39 \pm 87.13$ .

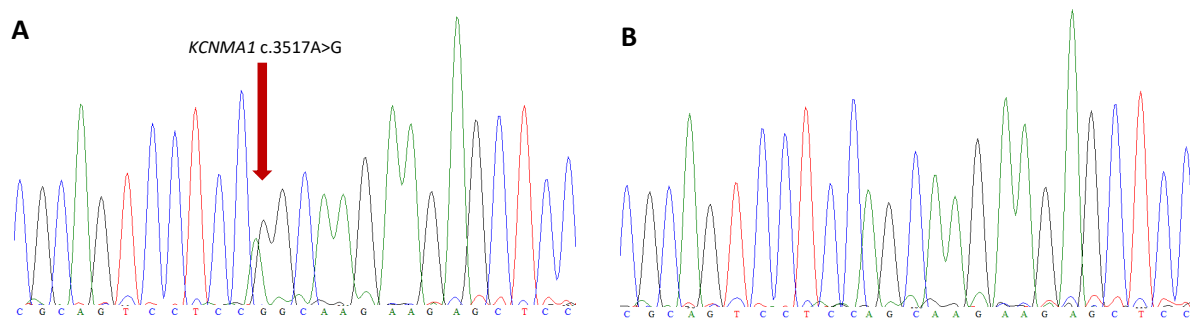

**Figure S2** Sanger sequencing confirmation of the identified variant in the gene *KCNMA1* (NM\_001322837.1; c.3517A>G) in A) SIDS192 and in B) a control sample. The sequencing was performed with the BigDye™ Terminator v3.1 cycle sequencing kit (ThermoFisher Scientific, Reinach, Switzerland) according to manufacturer's instruction. The software BioEdit Sequence Alignment Editor version 7.1.3.0 (<https://bioedit.software.informer.com/7.2/>) was used for visualization. Primer sequences are available on request.
